Water pH limits extracellular but not intracellular pH compensation in the CO<sub>2</sub> tolerant freshwater fish, *Pangasianodon hypophthalmus*.

Michael A Sackville<sup>1,\*</sup>, Ryan B Shartau<sup>1,\*</sup>, Christian Damsgaard<sup>2,3</sup>, Malthe Hvas<sup>2</sup>, Le My Phuong<sup>2</sup>, Tobias Wang<sup>2</sup>, Mark Bayley<sup>2</sup>, Do Thi Thanh Huong<sup>3</sup>, Nguyen Thanh Phuong<sup>3</sup> and Colin J Brauner<sup>1</sup>.

<sup>1</sup>Department of Zoology, University of British Columbia, Vancouver, British Columbia, Canada V6T 1Z4. <sup>2</sup>Department of Bioscience, Aarhus University, 8000 Aarhus-C, Denmark. <sup>3</sup>College of Aquaculture and Fisheries, Can Tho University, Can Tho, Vietnam.

\*Authors contributed equally to this work

keywords: acid-base, hypercarbia, pangasius, bicarbonate

## Summary Statement

Low water pH limits extracellular pH compensation in a CO<sub>2</sub> tolerant fish. This may increase selection for a more robust CO<sub>2</sub> defense strategy where intracellular pH is preferentially regulated.

## Abstract

Preferentially regulating intracellular pH (pH<sub>i</sub>) confers exceptional CO<sub>2</sub> tolerance on fishes, but is often associated with reductions in extracellular pH (pH<sub>e</sub>) compensation. It is unknown if these reductions are due to intrinsically lower capacities for pH<sub>e</sub> compensation, hypercarbia-induced reductions in water pH or other factors. To test how water pH affects capacities and strategies for pH compensation, we exposed the CO<sub>2</sub> tolerant fish, *Pangasianodon hypophthalmus* to 3 kPa PCO<sub>2</sub> for 20 h at ecologically relevant water pH's of 4.5 or 5.8. Brain, heart and liver pH<sub>i</sub> was preferentially regulated in both treatments. However, blood pH<sub>e</sub> compensation was severely reduced at water pH 4.5 but not 5.8. This suggests low water pH limits acute pH<sub>e</sub> but not pH<sub>i</sub> compensation in fishes preferentially regulating pH<sub>i</sub>. Hypercarbia-induced reductions in water pH might therefore underlie the unexplained reductions to pH<sub>e</sub> compensation in fishes preferentially regulating pH<sub>i</sub>, and may increase selection for preferential pH<sub>i</sub> regulation.

## Introduction

The aquatic partial pressure of carbon dioxide (PCO<sub>2</sub>) in tropical river basins can be driven above 6 kPa daily by microbial respiration and organic decay (Furch and Junk, 1997). These rapid elevations in PCO<sub>2</sub> exceed atmospheric levels by over 200-fold, and impose severe acute respiratory acidoses on fishes as CO<sub>2</sub> diffuses from the water into their blood and tissue (Heisler, 1984). Despite the extreme nature of these rapid acidoses, many fishes routinely endure this challenge, evidenced by the high levels of species richness and abundance in these environments (Dudgeon et al., 2006).

Coupled pH regulation ( $\text{pH}_{\text{coupled}}$ ) and preferential intracellular pH regulation ( $\text{pH}_{\text{pi}}$ ) are two strategies fishes use to compensate for acute respiratory acidoses (Shartau et al., 2016). These strategies represent endpoints of a continuum along which rates and degrees of intracellular pH ( $\text{pH}_{\text{i}}$ ) and extracellular pH ( $\text{pH}_{\text{e}}$ ) compensation vary. In  $\text{pH}_{\text{coupled}}$ , tissue  $\text{pH}_{\text{i}}$  is coupled to blood  $\text{pH}_{\text{e}}$ . During an acidosis,  $\text{pH}_{\text{i}}$  and  $\text{pH}_{\text{e}}$  both fall and recover together along similar trajectories within 24-48 h. Coupled recovery of  $\text{pH}_{\text{i}}$  and  $\text{pH}_{\text{e}}$  requires trans-epithelial exchange of acid-base relevant ions for net acid excretion and/or base uptake (Stewart 1978; Claiborne et al. 2002). The exchange of chloride for bicarbonate and/or sodium for protons is believed to primarily drive this recovery, but full compensation is generally associated with an increase in plasma bicarbonate balanced by an equimolar reduction in plasma chloride (Heisler, 1984; Brauner and Baker, 2009).

In  $\text{pH}_{\text{pi}}$ ,  $\text{pH}_{\text{i}}$  is not coupled to  $\text{pH}_{\text{e}}$ . Within minutes of  $\text{CO}_2$  exposure,  $\text{pH}_{\text{i}}$  is at or above control levels despite large reductions in  $\text{pH}_{\text{e}}$  (Baker 2010). Additionally,  $\text{pH}_{\text{e}}$  recovery is often incomplete or absent within 24-48 h (Brauner et al., 2004). Here,  $\text{pH}_{\text{i}}$  is maintained by the exchange of acid-base relevant ions between intra- and extracellular compartments whether  $\text{pH}_{\text{e}}$  compensation occurs or not (Brauner and Baker, 2009; Occhipinti and Boron, 2015), and reductions to the rate and degree of acute  $\text{pH}_{\text{e}}$  compensation remain unexplained.

Why fishes express  $\text{pH}_{\text{coupled}}$  or  $\text{pH}_{\text{pi}}$  is unclear. However, severe acute hypercarbia is hypothesized to select for  $\text{pH}_{\text{pi}}$  by exceeding the capacity and/or limiting the rate of acute  $\text{pH}_{\text{e}}$  compensation required for  $\text{pH}_{\text{coupled}}$  to defend  $\text{pH}_{\text{i}}$  (Shartau et al., 2016). Indeed, full  $\text{pH}_{\text{e}}$  compensation within 24-48 h of hypercarbia is limited to  $\sim 2$  kPa  $\text{PCO}_2$  in most freshwater fishes tested, while many fishes expressing  $\text{pH}_{\text{pi}}$  can robustly defend  $\text{pH}_{\text{i}}$  above 6 kPa  $\text{PCO}_2$  without  $\text{pH}_{\text{e}}$  compensation (Brauner and Baker, 2009; Shartau et al., 2016). One hypothesis for this apparent limit to acute  $\text{pH}_{\text{e}}$  compensation suggests many fishes are unable to elevate plasma bicarbonate above the  $\sim 25$ -30 mM required for full  $\text{pH}_{\text{e}}$  recovery at  $\sim 2$  kPa  $\text{PCO}_2$ , let alone the  $\sim 100$ -150 mM required at  $\sim 6$  kPa (Heisler, 1984; Brauner and Baker, 2009). A second hypothesis posits that water ion composition reduces the rate and/or degree of  $\text{pH}_{\text{e}}$  compensation by creating unfavourable trans-epithelial gradients for acid-base relevant ion exchange (Larsen and

Jensen, 1997). Indeed, most CO<sub>2</sub> exposures exceeding the capacity for acute pHe compensation in freshwater fishes also reduce water pH below 5.3, which is proposed to thermodynamically inhibit net proton excretion in rainbow trout at ambient PCO<sub>2</sub> (Lin and Randall, 1995). Despite supporting evidence for both hypotheses, neither has been directly tested for a role in limiting pHe compensation and selecting for pH<sub>pi</sub> during acute hypercarbia.

Recently, the Mekong catfish *Pangasianodon hypophthalmus* was reported to fully compensate pHe at 4 kPa PCO<sub>2</sub> (Damsgaard et al., 2015). Compensation was associated with a surprising ~45 mM increase in plasma bicarbonate within 48 h of exposure. This elevated capacity for acute pHe compensation suggests that *P. hypophthalmus* might express pH<sub>coupled</sub> rather than pH<sub>pi</sub> to defend pH<sub>i</sub> in acute hypercarbia above 2 kPa PCO<sub>2</sub>. This would be in stark contrast with 19 of 20 CO<sub>2</sub> tolerant freshwater fishes tested (Shartau et al., 2016), including the Amazonian catfish *Pterygoplichthys pardalis*, which expresses pH<sub>pi</sub> and negligible pHe compensation at 1-6 kPa PCO<sub>2</sub> (Brauner et al. 2004). However, pH<sub>i</sub> in the Mekong catfish *P. hypophthalmus* was not examined for preferential regulation, and water pH during hypercarbic exposure was 5.8 (Damsgaard et al., 2015). This is well above the proposed threshold water pH of 5.3 for net proton excretion in rainbow trout, and much higher than water pH in the *P. pardalis* study (water pH 4.5 at 4 kPa PCO<sub>2</sub>; Brauner et al., 2004).

We therefore sought to answer two questions. First, is the exceptional capacity for acute pHe compensation in *P. hypophthalmus* limited by a lower, more common hypercarbic water pH? Second, if pHe compensation is limited by low water pH, can *P. hypophthalmus* express pH<sub>pi</sub> like most other CO<sub>2</sub> tolerant freshwater fishes tested? To address these questions, we measured pHe and pH<sub>i</sub> in *P. hypophthalmus* during exposure to 3 kPa PCO<sub>2</sub> for 20 h in water artificially held at pH 4.5 or 5.8. Our results should provide further insight into the factors limiting pH<sub>coupled</sub> and selecting for pH<sub>pi</sub>.

## Materials and methods

### Animal husbandry

*Pangasianodon hypophthalmus* were obtained from a local fish supplier in Can Tho, Vietnam and kept at Can Tho University for three months prior to experimentation. Fish were held in aerated 3000 L tanks fitted with a recirculating biofiltration system and kept on a 12:12 light:dark photoperiod. Water  $\text{Cl}^-$  and pH in these holding conditions were 0.35 mM and  $7.2 \pm 0.1$ , respectively, which is similar to that listed for native habitat in the nearby Mekong River (in mM:  $[\text{Cl}^-]$  0.28,  $[\text{Na}^+]$  0.39,  $[\text{Ca}^{2+}]$  0.63,  $[\text{Mg}^{2+}]$  0.33,  $[\text{CaCO}_3]$  0.53, pH 7.2; Ozaki et al., 2014; Kongmeng and Larsen 2014). Fish were fed to satiation once daily with a commercial dry pellet obtained from a local supplier and held under these conditions for at least 3 weeks prior to experimentation. Fish wet mass ranged between 50-100 g. All husbandry and experimentation were performed in accordance with national guidelines for the protection of animal welfare in Vietnam as well as the University of British Columbia Animal Use Protocol (AUP) #A11-0235.

### Protocol & measurements

One day prior to experimentation, fish were randomly transferred from holding tanks to a 200 L aerated experimental tank kept at 28°C. On the day of experimentation, fish were exposed to 3 kPa  $\text{PCO}_2$  in water at a pH of either 5.8 or 4.5 for up to 20 h. Water pH of 5.8 was achieved by bubbling 3%  $\text{CO}_2$  into the aerated experimental water at trial onset. Water pH of 4.5 was achieved by simultaneously introducing sulfuric acid ( $\text{H}_2\text{SO}_4$ ) into the aerated experimental water while bubbling with 3%  $\text{CO}_2$ . 4.5 was chosen as the lower water pH because it matches that of a previous study where the Amazonian catfish *Pterygoplichthys pardalis* was exposed to 3 kPa  $\text{PCO}_2$  (Brauner et al., 2004). The desired  $\text{PCO}_2$  and water pH for each treatment were reached within 15 minutes of trial onset. Sulfuric acid was used to avoid introducing ions, such as  $\text{Na}^+$  and  $\text{Cl}^-$ , which may confound the effects of water pH on acid-base regulation. Water  $\text{PCO}_2$  and pH were monitored continuously using an Oxyguard Pacific system fitted with a G10ps  $\text{CO}_2$  probe and a K01svpld pH probe (Oxyguard International A/S, Farum, Denmark). The G10ps probe measures  $\text{PCO}_2$  independently of water pH, such that

measurements are not confounded by pH changes in the experimental treatments. A mix of CO<sub>2</sub> and air was regulated by the Oxyguard system to reach and maintain constant water PCO<sub>2</sub> of 3 kPa ( $\pm$  0.02 kPa) and full oxygen saturation. Fish were terminally sampled following 0, 3 and 20 h exposure to 3 kPa PCO<sub>2</sub> in both water pH treatments.

Prior to sampling, fish were rapidly transferred (<1-2 seconds) from experimental tanks by net to a neighboring 20 L tank containing a lethal concentration of benzocaine (100 mg L<sup>-1</sup> benzocaine in 3 mL of 70% ethanol), which was darkened and covered to reduce struggling during euthanasia. Following cessation of gill ventilation (<2 min), a 0.5 ml blood sample was collected by caudal puncture with a heparinized syringe. Blood samples were subsequently divided into two aliquots, one of which was immediately measured for pH (pH<sub>e</sub>). The spinal cord was then severed, and tissues (heart, liver and brain) were excised, wrapped in pre-labeled aluminum foil and frozen in liquid nitrogen. This entire procedure was completed within 2 minutes of ventilatory arrest. The second blood aliquot was centrifuged for three minutes at 6000 rpm to separate plasma and red blood cells (RBC's). Plasma and RBC's were frozen in liquid nitrogen with the tissue samples, and all samples were subsequently transferred to -80°C for storage until further analysis.

Extracellular, intracellular and water pH was measured with a Radiometer Analytical SAS pH electrode (GK2401C; Cedex, France) connected to a Radiometer PHM 84 (Copenhagen, Denmark) thermostatted to 28°C to match water temperature of the experiments. RBC pH<sub>i</sub> was measured according to the freeze-thaw method (Zeilder and Kim, 1977), and tissue pH<sub>i</sub> was measured according to the metabolic inhibitor tissue homogenate method (Portner et al., 1990; McKenzie et al., 2003; Baker et al., 2009b). Total CO<sub>2</sub> (TCO<sub>2</sub>) was measured in plasma (Corning 965 CO<sub>2</sub> analyzer; Essex, UK). Blood PCO<sub>2</sub> and plasma [HCO<sub>3</sub><sup>-</sup>] were calculated from pH<sub>e</sub> and TCO<sub>2</sub> with the Henderson-Hasselbalch equation. CO<sub>2</sub> solubility ( $\alpha$ CO<sub>2</sub>) and pK' values were taken from Boutilier et al. (1984).

## Statistics

Data were analyzed with Prism 5 for Mac OS X (Version 5.0a; GraphPad Software, Inc). Means for each metric were compared within treatments and across time with one-way ANOVA and Tukey's post hoc test ( $P < 0.05$ ). All data are presented as means  $\pm$  s.e.m.

## **Results and discussion**

After 3 h of hypercarbia,  $pH_e$  fell dramatically in both treatments as expected. The increased blood  $PCO_2$  reduced  $pH_e$  from  $7.79 \pm 0.02$  to  $7.40 \pm 0.03$  and  $7.45 \pm 0.012$  in  $pH_{5.8_{\text{water}}}$  and  $pH_{4.5_{\text{water}}}$ , respectively ( $P < 0.01$ ; Fig. 1). Furthermore,  $pH_e$  in both treatments fell below the blood non-bicarbonate buffer line (Fig.1). This suggests a metabolic component to the extracellular acidosis in both treatments, but plasma lactate concentration did not increase (Table 1). Thus, this metabolic component was instead likely due to a net exchange of  $HCO_3^-$  and/or  $H^+$  between the intra- and extracellular compartments, which is consistent with  $pH_{pi}$  expression (Heisler et al., 1982; Baker et al., 2009a).

After 20 h of hypercarbia, there was evidence for  $pH_e$  compensation in  $pH_{5.8_{\text{water}}}$  but little in  $pH_{4.5_{\text{water}}}$ . In  $pH_{5.8_{\text{water}}}$ ,  $pH_e$  recovered by  $\sim 40\%$  from 3 h (Fig. 1,  $P < 0.05$ ) as plasma  $[HCO_3^-]$  doubled to exceed the blood buffer line by  $\sim 9$  mM at the respective  $PCO_2$  (Fig. 1,  $P < 0.01$ ). In contrast,  $pH_e$  in  $pH_{4.5_{\text{water}}}$  did not recover significantly from 3 h (Fig. 1), and plasma  $[HCO_3^-]$  did not exceed the blood buffer line (Fig. 1).

Tissue  $pH_i$  of brain, heart and liver was preferentially regulated in both  $pH_{5.8_{\text{water}}}$  and  $pH_{4.5_{\text{water}}}$  (Fig. 2), but variation between tissues and treatments exists. Brain  $pH_i$  increased from control after 3 h of hypercarbia in both treatments ( $P < 0.05$ ) and remained elevated at 20 h (Fig. 2). In contrast, heart and liver  $pH_i$  did not differ significantly from controls in either treatment at any time. However, heart and liver  $pH_i$  did differ within their respective tissues between 3 and 20 h in the  $pH_{5.8_{\text{water}}}$  treatment (Fig. 2,  $P < 0.05$ ). Thus, brain  $pH_i$  appears more robustly defended than that of heart and liver, and heart and liver  $pH_i$  appears more tightly regulated in  $pH_{4.5_{\text{water}}}$  than

pH<sub>5.8water</sub>. The latter difference could be attributed to a greater acidosis associated with higher in vivo  $PCO_2$  in pH<sub>5.8water</sub> (Fig. 1), but this remains unknown. Red blood cell (RBC)  $pH_i$  fell with  $pH_e$  at 3 h in both treatments (Fig. 2), and did not recover within 20 h despite significantly increasing in pH<sub>4.5water</sub>. Lack of RBC  $pH_i$  regulation is observed in all fishes expressing  $pH_{pi}$  to date (Shartau et al., 2016) and consistent with the absence of  $\beta$ -adrenergically stimulated NHE in Siluriformes (Berenbrink et al., 2005; Phuong et al., 2017). Despite this variation, the observed patterns in  $pH_i$  across all tissues in both treatments were typical of  $pH_{pi}$  expression (Shartau et al., 2016), and are corroborated by the reduction in plasma  $[HCO_3^-]$  below the blood buffer line observed after 3 h of hypercarbia in both treatments.

Our results show that the exceptional rate and degree of acute  $pH_e$  compensation in *P. hypophthalmus* is severely limited at a water pH of 4.5. Furthermore, *P. hypophthalmus* expresses  $pH_{pi}$  rather than  $pH_{coupled}$  whether  $pH_e$  compensation occurs or not. As discussed below, this suggests hypercarbia-induced reductions in water pH may underlie previously unexplained reductions to the rate and degree of  $pH_e$  compensation in fishes expressing  $pH_{pi}$ . Variation in buffering capacity of the surrounding water might therefore mask higher, more similar rates and degrees of acute  $pH_e$  compensation across teleosts than previously believed, and low water buffering capacity may increase selection for  $pH_{pi}$  at  $PCO_2$  normally within the limits of acute  $pH_e$  compensation and  $pH_{coupled}$ .

Impaired  $pH_e$  compensation in *P. hypophthalmus* at a water pH of 4.5 is associated with an absence of net trans-epithelial exchange of acid-base relevant ions. Low water pH is hypothesized to inhibit bicarbonate uptake and proton excretion by creating unfavourable trans-epithelial gradients for ion transport machinery (Parks et al., 2010) and/or directly impairing transporter structure-function (Kwong et al. 2014). Indeed, inhibition of trans-epithelial ion flux by low water pH at ambient  $PCO_2$  has been shown in several fishes (Freda and McDonald, 1988; Shartau et al., 2017b; Ultsch, 1988). Although not tested here, similar thermodynamic and/or structure-function effects on ion transport could be limiting  $pH_e$  compensation in *P. hypophthalmus*. However, many fishes adapted to low pH environments still regulate plasma ions (Kwong et al. 2014).



Thus, determining if and how these fishes might compensate  $pH_e$  at low water pH also merits future study.

Surprisingly, this study is the first to directly test the isolated effects of water pH on acid-base regulation in fishes during acute hypercarbia. Previous studies have shown that acute  $pH_e$  compensation is also affected to a lesser degree by variation in water hardness and ion composition (Larsen and Jensen, 1997; Tovey and Brauner, 2017). However, logistical constraints precluded manipulating individual ions and controlling for pH in these studies. As a result, water pH differed by 1.5 units between treatments in some cases, and higher water pH was always associated with higher rates and degrees of  $pH_e$  compensation. In light of our findings, revisiting these experiments while controlling for water pH would be of interest, helping to further disentangle the effects of pH from other ions on acid-base regulation in fishes.

Fishes expressing  $pH_{pi}$  often exhibit reduced rates and degrees of acute  $pH_e$  compensation relative to fishes expressing  $pH_{coupled}$  (Shartau and Brauner, 2016). Furthermore, the approximate limit of 2 kPa  $PCO_2$  for acute  $pH_e$  compensation observed in many freshwater teleosts expressing  $pH_{coupled}$  (Heisler 1984; Brauner and Baker 2009) is much less than the 3-4 kPa limit observed in many marine teleosts (Hayashi et al., 2004; Perry et al., 2010). However, we show that low water pH during hypercarbia inhibits a rate and degree of acute  $pH_e$  compensation in a freshwater fish expressing  $pH_{pi}$  that equals that of marine teleosts. This suggests low water pH might underlie previously observed reductions in the rate and degree of acute  $pH_e$  compensation in other fishes expressing  $pH_{pi}$ . Further, it suggests that all teleosts, whether expressing  $pH_{pi}/pH_{coupled}$  or freshwater/marine, might possess similarly high capacities for acute  $pH_e$  compensation. Indeed, differences in water buffering capacity could underlie much of the observed variation in these traits. Most fishes expressing  $pH_{pi}$  are investigated in the poorly buffered waters of their native tropical river basins (Shartau and Brauner, 2014), where modest hypercarbia dramatically reduces water pH (pH 4.5 at 3 kPa  $PCO_2$ , Rio Blanco, Brazil; Gonzalez et al., 2005). These tropical waters are more poorly buffered than those in which fishes expressing  $pH_{coupled}$  are typically tested (pH 5.5 at 3 kPa  $PCO_2$  in Vancouver city water, Canada; Shartau et al., 2017b), and both are lower than seawater (pH 6.9 at 3 kPa  $PCO_2$ ; Hayashi et al., 2004). Other studies further

support this hypothesis. For example, freshwater rainbow trout express  $\text{pH}_{\text{coupled}}$  and typically have a limit of  $\sim 2$  kPa  $\text{PCO}_2$  for acute  $\text{pH}_e$  compensation (Wood and LeMoigne, 1991; Baker and Brauner, 2009). However, rainbow trout exposed to hypercarbia in water at pH 6.9 fully compensated  $\text{pH}_e$  at  $\sim 3$  kPa  $\text{PCO}_2$  within 24-48 h (Dimberg, 1988; Larsen and Jensen, 1997). This was accomplished by a net 45 mM increase in plasma bicarbonate, matching that observed in *P. hypophthalmus* and marine teleosts. Thus, low water buffering capacity may mask shared, higher capacities for acute  $\text{pH}_e$  compensation closer to 3-4 kPa  $\text{PCO}_2$  across teleosts.

We are also first to observe  $\text{pH}_{\text{pi}}$  expression in the presence and absence of acute  $\text{pH}_e$  compensation at the same  $\text{PCO}_2$  in one species. This preference to regulate  $\text{pH}_e$  despite the ability to independently maintain  $\text{pH}_i$  suggests that even fishes expressing  $\text{pH}_{\text{pi}}$  may incur performance costs in the absence of  $\text{pH}_e$  compensation. The nature of these costs remains unknown, but if low water pH inhibits trans-epithelial ion transport as discussed, other vital processes relying on the same ion transport pathways could be impacted (e.g. osmoregulation, ammonia excretion, RBC function, etc). This finding suggests that fishes expressing  $\text{pH}_{\text{pi}}$  in low water pH during hypercarbia might incur additional performance costs relative to those expressing  $\text{pH}_{\text{pi}}$  in high water pH. Thus, at  $\text{PCO}_2$  within the limits of  $\text{pH}_e$  compensation, water buffering capacity might be an important layer of habitat complexity that affects the performance and distribution of fishes regardless of whether they express  $\text{pH}_{\text{coupled}}$  or  $\text{pH}_{\text{pi}}$ .

Our findings highlight an important role for water pH in determining the rate and degree of acute  $\text{pH}_e$  compensation in *P. hypophthalmus* specifically, and perhaps in fishes generally. This suggests hypercarbia-induced reductions in water pH may underlie previously unexplained reductions to the rate and degree of  $\text{pH}_e$  compensation in fishes expressing  $\text{pH}_{\text{pi}}$ . Based on these results, we suggest a higher limit for acute  $\text{pH}_e$  compensation closer to 3-4 kPa  $\text{PCO}_2$  might be shared across teleosts when uninhibited by water pH. Low water buffering capacity might therefore be an important selective pressure for  $\text{pH}_{\text{pi}}$  at  $\text{CO}_2$  tensions normally within the limits of acute  $\text{pH}_e$  compensation and  $\text{pH}_{\text{coupled}}$ .

**Competing interests**

No competing interests declared.

**Author contributions**

MS and RS wrote the manuscript. All authors provided editorial input and contributed to experimental design, data collection and analysis.

**Funding**

This study was supported by a Natural Sciences and Engineering Research Council of Canada (NSERC) Accelerator Supplement (446005-13) and Discovery Grant (261924-13) to CB. MS and RS were supported by NSERC Canada Graduate Scholarships, and CD by the Carlsberg Foundation.

## References

- Baker, D. W., Matey, V., Huynh, K. T., Wilson, J. M., Morgan, J. D. and Brauner, C. J.** (2009a). Complete intracellular pH protection during extracellular pH depression is associated with hypercarbia tolerance in white sturgeon, *Acipenser transmontanus*. *Am. J. Physiol. Regul. Integr. Comp. Physiol.* **296**, R1868–80.
- Baker, D. W., May, C. and Brauner, C. J.** (2009b). A validation of intracellular pH measurements in fish exposed to hypercarbia: the effect of duration of tissue storage and efficacy of the metabolic inhibitor tissue homogenate method. *J. Fish Biol.* **75**, 268–275.
- Baker, D. W.** (2010). Physiological responses associated with aquatic hypercarbia in the CO<sub>2</sub> tolerant white sturgeon, *Acipenser transmontanus*. *PhD thesis*, University of British Columbia, Vancouver, BC.
- Berenbrink, M., Koldkjaer, P., Kepp, O. and Cossins, A. R.** (2005). Evolution of oxygen secretion in fishes and the emergence of a complex physiological system. *Science* **307**, 1752–1757.
- Boutilier, R. G., Heming, T. A. and Iwama, G. K.** (1984). Appendix: physicochemical parameters for use in fish respiratory physiology. In *Fish Physiology* (ed. Hoar, W. S. and Randall, D. J.), pp. 403–430. New York: Academic.
- Brauner, C. J. and Baker, D. W.** (2009). Patterns of acid-base regulation during exposure to hypercarbia in fish. In *Cardio-Respiratory Control in Vertebrates: Comparative and Evolutionary Aspects* (ed. Glass, M. L. and Wood, S. C.), pp. 43–63. Berlin, Germany: Springer-Verlag.
- Brauner, C. J., Wang, T., Wang, Y., Richards, J. G., Gonzalez, R. J., Bernier, N. J., Xi, W., Patrick, M. and Val, A. L.** (2004). Limited extracellular but complete intracellular acid-base regulation during short-term environmental hypercapnia in the armoured catfish, *Liposarcus pardalis*. *J. Exp. Biol.* **207**, 3381–3390.
- Claiborne, J. B., Edwards, S. L. and Morrison-Shetlar, A. I.** (2002). Acid-base regulation in fishes: cellular and molecular mechanisms. *J. Exp. Zool.* **293**, 302–319.
- Damsgaard, C., Gam, L. T. H., Dang, D. T., Van Thinh, P., Huong, D. T. T., Wang, T. and Bayley, M.** (2015). High capacity for extracellular acid-base regulation in the air-breathing fish *Pangasianodon hypophthalmus*. *J. Exp. Biol.* **218**, 1290–1294.
- Dimberg, K.** (1988). High blood CO<sub>2</sub> levels in rainbow trout exposed to hypercapnia in

- bicarbonate-rich hard fresh water - a methodological verification. *J. Exp. Biol.* **134**, 463–466.
- Dudgeon, D., Arthington, A. H., Gessner, M. O., Kawabata, Z. I., Knowler, D. J., Lévêque, C., Naiman, R. J., Prieur Richard, A. H., Soto, D., Stiassny, M. L. J., et al.** (2006). Freshwater biodiversity: importance, threats, status and conservation challenges. *Biological Reviews* **81**, 163–182.
- Evans, D. H., Piermarini, P. M. and Choe, K. P.** (2005). The multifunctional fish gill: Dominant site of gas exchange, osmoregulation, acid-base regulation, and excretion of nitrogenous waste. *Physiol. Rev.* **85**, 97–177.
- Freda, J. and McDonald, D. G.** (1988). Physiological correlates of interspecific variation in acid tolerance in fish. *J. Exp. Biol.* **136**, 243–258.
- Furch, K. and Junk, W. J.** (1997). Physicochemical Conditions in the Floodplains. In *The Central Amazon Floodplain*, pp. 69–108. Berlin, Heidelberg: Springer Berlin Heidelberg.
- Gonzalez, R. J., Wilson, R. W. and Wood, C. M.** (2005). Ionoregulation in Tropical Fishes from Ion-Poor, Acidic Blackwaters. In *The Physiology of Tropical Fishes: Fish Physiology*, pp. 397–442. New York: Academic Press.
- Hayashi, M., Kita, J. and Ishimatsu, A.** (2004). Acid-base responses to lethal aquatic hypercapnia in three marine fishes. *Mar. Biol.* **144**, 153–160.
- Heisler, N.** (1982). Intracellular and extracellular acid-base regulation in the tropical freshwater teleost fish *Synbranchus marmoratus* in response to the transition from water breathing to air breathing. *J. Exp. Biol.* **99**, 9–28.
- Heisler, N.** (1984). Acid-base regulation in fishes. In *Fish Physiology* (ed. Hoar, W. S. and Randall, D. J.), pp. 315–401. San Diego: Academic.
- Kongmeng, L. Y. and Larsen, H.** (2014). 2014 Lower Mekong Regional Water Quality Monitoring Report. In *MRC Technical Paper No. 60*. Mekong River Commission, Vientiane.
- Kwong, R. W. M., Kumai, Y. and Perry, S. F.** (2014). The physiology of fish at low pH: the zebrafish as a model system. *J. Exp. Biol.* **217**, 651–662.
- Larsen, B. K. and Jensen, F. B.** (1997). Influence of ionic composition on acid-base regulation in rainbow trout (*Oncorhynchus mykiss*) exposed to environmental hypercapnia. *Fish Physiol. Biochem.* **16**, 157–170.
- Li, S., Lu, X. X. and Bush, R. T.** (2013). CO<sub>2</sub> partial pressure and CO<sub>2</sub> emission in the

- Lower Mekong River. *J. Hydrol.* **504**, 40–56.
- Lin, H. and Randall, D.** (1995). Proton pumps in fish gills. In *Fish Physiology* (ed. Wood, C. M. and Shuttleworth, T. J.), pp. 229–255. Fish Physiology.
- Lin, H. and Randall, D. J.** (1991). Evidence for the presence of an electrogenic proton pump on the trout gill epithelium. *J. Exp. Biol.* **161**, 119–134.
- McDonald, D. G.** (1983). The Interaction of Environmental Calcium and Low pH on the Physiology of the Rainbow Trout, *Salmo Gairdneri*: I. Branchial and Renal Net Ion and H<sup>+</sup> Fluxes. *J. Exp. Biol.* **102**, 123–140.
- McDonald, D. G., Freda, J., Cavdek, V., Gonzalez, R. and Zia, S.** (1991). Interspecific Differences in Gill Morphology of Freshwater Fish in Relation to Tolerance of Low-pH Environments. *Physiol. Zool.* **64**, 124–144.
- McKenzie, D. J., Picolella, M., Dalla Valle, A. Z., Taylor, E. W., Bolis, C. W. and Steffensen, J. F.** (2003). Tolerance of chronic hypercapnia by the European eel *Anguilla anguilla*. *J. Exp. Biol.* **206**, 1717–1726.
- Occhipinti, R. and Boron, W. F.** (2015). Mathematical modeling of acid-base physiology. *Prog. Biophys. Mol. Biol.* **117**, 557–573.
- Ozaki, H., Co, T. K., Le, A. K., Pham, V. N., Nguyen, V. B., Tarao, M., Nguyen, H. C., Le, V. D., Nguyen, H. T., Sagehashi, M., Ninomiya-Lim, S., Gomi, T., Hosomi, M., and Takada, H.** (2014). Human factors and tidal influences on water quality of an urban river in Can Tho, a major city of the Mekong Delta, Vietnam. *Environ. Monit. Assess.* **186**, 845–858.
- Parks, S. K., Tresguerres, M., Galvez, F. and Goss, G. G.** (2010). Intracellular pH regulation in isolated trout gill mitochondrion-rich (MR) cell subtypes: evidence for Na<sup>+</sup>/H<sup>+</sup> activity. *Comp. Biochem. Phys. A.* **155**, 139–145.
- Perry, S. F. and Gilmour, K. M.** (2006). Acid-base balance and CO<sub>2</sub> excretion in fish: unanswered questions and emerging models. *Respir. Physiol. Neurobiol.* **154**, 199–215.
- Perry, S. F., Braun, M. H., Genz, J., Vulesevic, B., Taylor, J., Grosell, M. and Gilmour, K. M.** (2010). Acid-base regulation in the plainfin midshipman (*Porichthys notatus*): an aglomerular marine teleost. *J. Comp. Physiol. B.* **180**, 1213–1225.
- Phuong, L. M., Damsgaard, C., Ishimatsu, A. and Wang, T.** (2017). Recovery of blood gases and haematological parameters upon anaesthesia with benzocaine, MS-222 or Aqui-S in the air-breathing catfish *Pangasianodon hypophthalmus*. *Ichthyol. Res.* **64**,

84-92.

- Portner, H. O., Boutilier, R. G., Tang, Y. and Toews, D. P.** (1990). Determination of intracellular pH and PCO<sub>2</sub> values after metabolic inhibition by fluoride and nitrilotriacetic acid. *Respir. Physiol.* **81**, 255–274.
- Shartau, R. B. and Brauner, C. J.** (2014). Acid-base and ion balance in fishes with bimodal respiration. *J. Fish Biol.* **84**, 682–704.
- Shartau, R. B., Baker, D. W. and Brauner, C. J.** (2017a). White sturgeon (*Acipenser transmontanus*) acid-base regulation differs in response to different types of acidoses. *J. Comp. Physiol. B.* **187**, 985-994.
- Shartau, R. B., Baker, D. W., Crossley, D. A. and Brauner, C. J.** (2016). Preferential intracellular pH regulation: hypotheses and perspectives. *J. Exp. Biol.* **219**, 2235–2244.
- Shartau, R. B., Brix, K. V. and Brauner, C. J.** (2017b). Characterization of Na<sup>+</sup> transport to gain insight into the mechanism of acid-base and ion regulation in white sturgeon (*Acipenser transmontanus*). *Comp. Biochem. Phys. A.* **204**, 197–204.
- Tovey, K. J. and Brauner, C. J.** (2017). Effects of water ionic composition on acid–base regulation in rainbow trout, during hypercarbia at rest and during sustained exercise. *J. Comp. Physiol. B.* **188**, 295-304.
- Ultsch, G. R.** (1988). Blood-Gases, Hematocrit, Plasma Ion Concentrations, and Acid-Base Status of Musk Turtles (*Sternotherus-Odoratus*) during Simulated Hibernation. *Physiol. Zool.* **61**, 78–94.
- Wood, C. M. and LeMoigne, J.** (1991). Intracellular acid-base responses to environmental hyperoxia and normoxic recovery in rainbow trout. *Respir. Physiol.* **86**, 91–113.

## Figures

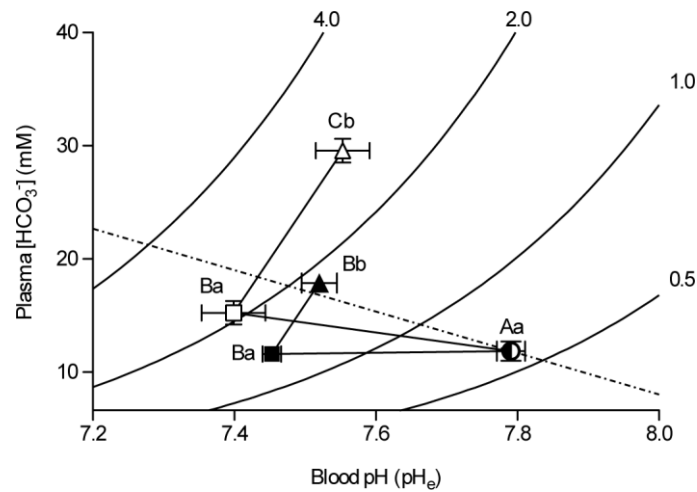

**Fig. 1. Extracellular acid-base status in *Pangasianodon hypophthalmus* during exposure to 3 kPa  $PCO_2$ .** Extracellular blood pH vs  $[HCO_3^-]_{\text{plasma}}$  after 0 (circles), 3 (squares) and 20 h (triangles) exposure to 3 kPa  $PCO_2$  at pH4.5<sub>water</sub> (shaded symbols) or pH5.8<sub>water</sub> (open symbols). Dashed and curved lines represent the blood non-bicarbonate buffer line and  $PCO_2$ -isopleths in kPa, respectively. Data presented as means $\pm$ s.e.m. Upper and lower case letters indicate significant differences within treatments for blood pH and  $[HCO_3^-]_{\text{plasma}}$ , respectively (n=8, one-way ANOVA,  $P<0.05$ ).



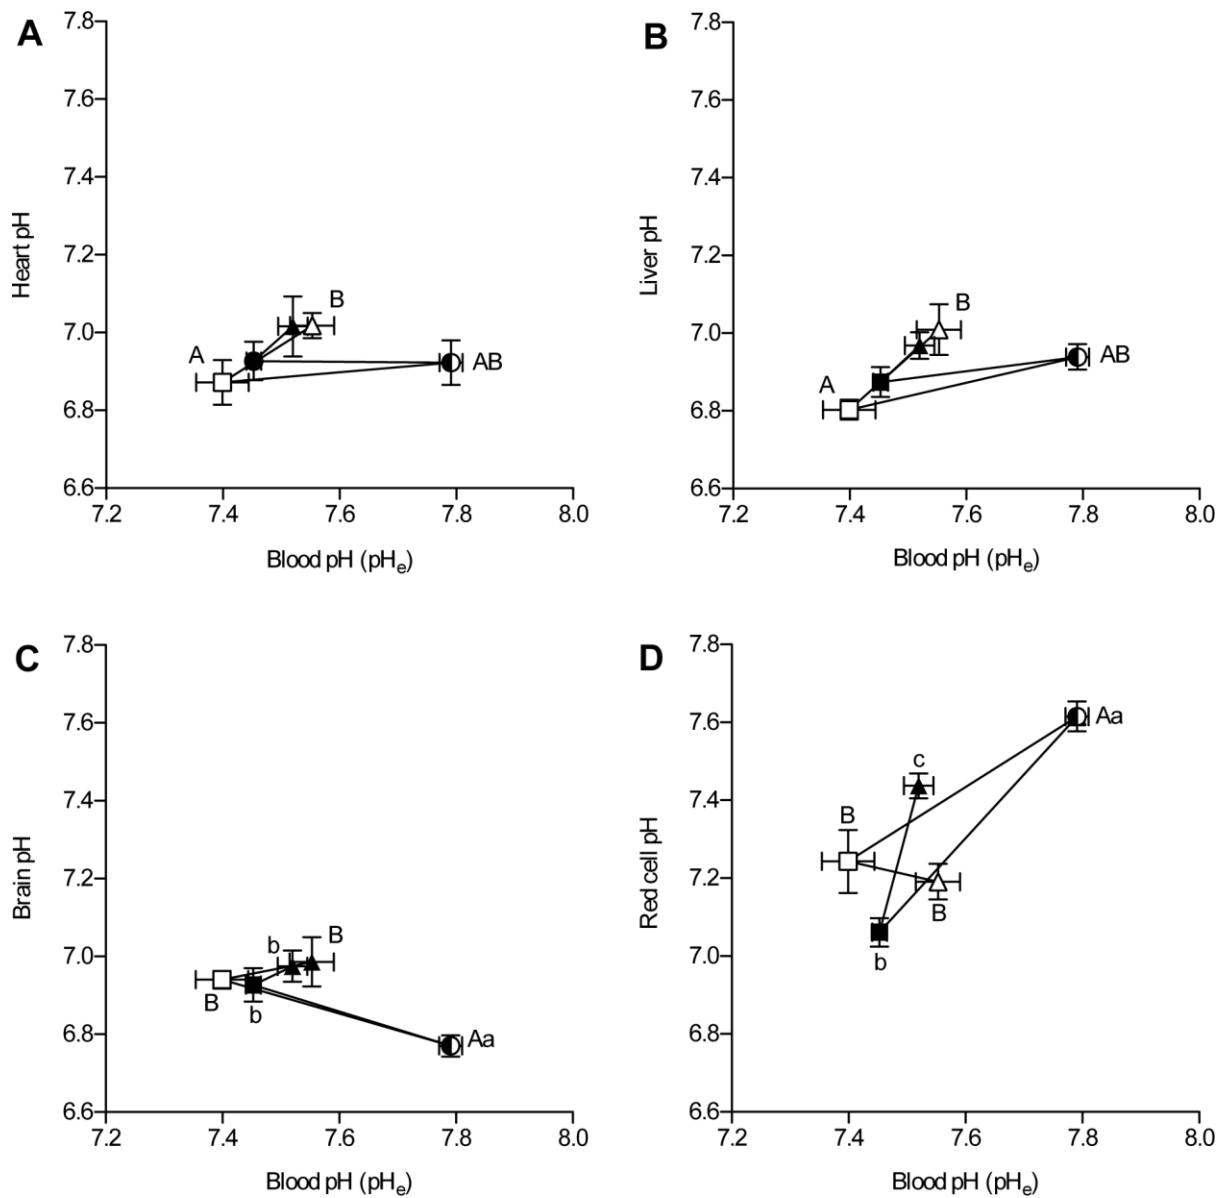

**Fig. 2. Intracellular pH of *Pangasianodon hypophthalmus* during exposure to 3 kPa  $PCO_2$ .** Extracellular blood pH vs intracellular pH of heart (A), liver (B), brain (C) and red blood cell (D) after 0 (circles), 3 (squares) and 20 h (triangles) exposure to 3 kPa  $PCO_2$  at pH4.5<sub>water</sub> (shaded symbols) or pH5.8<sub>water</sub> (open symbols). Data presented as means $\pm$ s.e.m. Lower and upper case letters indicate significant differences for intracellular pH in pH4.5<sub>water</sub> and pH5.8<sub>water</sub>, respectively (n=8, one-way ANOVA,  $P<0.05$ ).

## Tables

**Table 1. Plasma [Lactate<sup>-</sup>] of *Pangasianodon hypophthalmus* after 0, 3 and 20 h in 3 kPa PCO<sub>2</sub> at water pH 5.8 or 4.5.** Data presented as means±s.e.m. No significant differences from 0 h within treatments (n=8, one-way ANOVA, P>0.05).

| Time (h) | Plasma Lactate (mM)    |                        |
|----------|------------------------|------------------------|
|          | pH5.8 <sub>water</sub> | pH4.5 <sub>water</sub> |
| 0        | 1.71±0.31              | 1.71±0.31              |
| 3        | 1.80±0.16              | 1.72±0.12              |
| 20       | 1.60±0.44              | 1.42±0.20              |
